# Supplementary material for: Parental Seasonal Influenza Vaccine Hesitancy and Associated Factors in Shanghai, China, during the COVID-19 Pandemic: A Cross-Sectional Study
Source: MDPI journal article supplement (doi:10.3390/vaccines10122109), 2022-12-09
Supplement: s1 [file s1]

## Content

Figure S1. Areas in Pudong New Area in Shanghai.

Table S1. Exploratory factor analysis (EFA) and reliability results of the scale.

Table S2. Scores for each item of the IVH characteristics scale (parents of children under 14).

Table S3. Comparison of the scores of each dimension of the "3C" model for different IVH groupings (parents of children under 5).

Table S4. Logistic regression analysis of predictors of parental IVH (parents of children under 5).

Figure S2. Key ways to learn about flu and the flu vaccine among parents.

Figure S3. Reasons for not getting the flu vaccine among parents during the 2020/2021 flu season.

Figure S4. Reasons for flu vaccine hesitation among parents for the coming flu season.

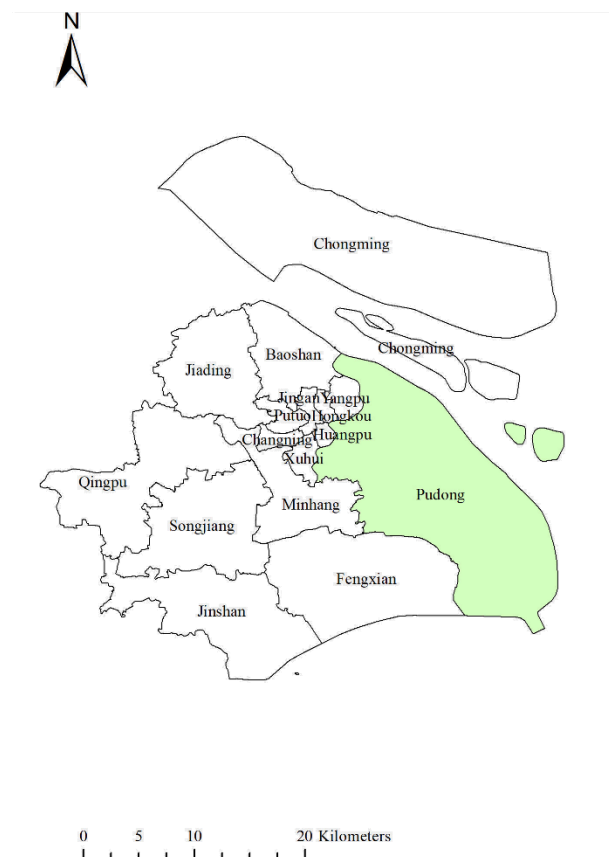

**Figure S1.** Areas in Pudong New Area in Shanghai.

**Table S1.** Exploratory factor analysis (EFA) and reliability results of the scale.

| Dimensions      | Item | Standardize<br>d<br>loadings | Communalit<br>y | Eigenvalue<br>s | Variance<br>explained<br>(%) | Cronbach's<br>alpha | CR    | AVE   |
|-----------------|------|------------------------------|-----------------|-----------------|------------------------------|---------------------|-------|-------|
| Confidence      | L1   | 0.756                        | 0.637           | 3.983           | 36.210                       | 0.909               | 0.912 | 0.675 |
|                 | L2   | 0.773                        | 0.677           |                 |                              |                     |       |       |
|                 | L3   | 0.825                        | 0.726           |                 |                              |                     |       |       |
|                 | L4   | 0.883                        | 0.825           |                 |                              |                     |       |       |
|                 | L5   | 0.864                        | 0.797           |                 |                              |                     |       |       |
| Complacenc<br>y | L6   | 0.614                        | 0.731           | 2.138           | 19.436                       | 0.776               | 0.791 | 0.563 |
|                 | L7   | 0.858                        | 0.752           |                 |                              |                     |       |       |
|                 | L8   | 0.758                        | 0.679           |                 |                              |                     |       |       |
| Convenience     | L9   | 0.523                        | 0.594           | 1.771           | 16.104                       | 0.682               | 0.786 | 0.560 |
|                 | L10  | 0.863                        | 0.746           |                 |                              |                     |       |       |
|                 | L11  | 0.814                        | 0.729           |                 |                              |                     |       |       |
| Full scale      |      |                              |                 |                 | 71.749                       | 0.876               |       |       |

\*Name of each item

L1. I think the flu vaccine is safe.

L2. I believe the flu vaccine can prevent the flu.

L3. I believe the flu vaccine can reduce severe influenza-related illnesses and deaths.

L4. I trust the vaccine-related information provided by the vaccination clinic and the vaccinator.

L5. I believe that healthcare workers.

L6. I think it is necessary to vaccinate children against the flu during the COVID-19 epidemic.

L7. I think my child has a higher probability of getting the flu.

L8. I think the flu is serious.

L9. I have convenient transportation to the vaccination site and have time.

L10. I think the current flu vaccine is overpriced.

L11. I think the environment of the vaccination clinic is poor.

\*The overall Cronbach's alpha=0.876 and the Cronbach's alpha for the three dimensions of confidence, complacency, and convenience were 0.909, 0.776, and 0.682, respectively. The KMO value was 0.889, which was greater than 0.8, and Bartlett's test of  $P < 0.001$ . Meanwhile, exploratory factor analysis revealed that the scale consisted of three main factors with a cumulative variance contribution of 71.749%, and the factor loadings of each item are shown in Table S1.

**Table S2.** Scores for each item of the IVH characteristics scale (parents of children under 14).

| Dimension                            | Items | Total score average | IVH status               |                           | t        | P      | IVH characteristic score |              | t        | P      |
|--------------------------------------|-------|---------------------|--------------------------|---------------------------|----------|--------|--------------------------|--------------|----------|--------|
|                                      |       |                     | Vaccine hesitant (IVH=1) | Vaccine acceptant (IVH=0) |          |        | Mild (≥40)               | Severe (<40) |          |        |
| Confidence                           |       |                     |                          |                           |          |        |                          |              |          |        |
| Safety                               | L1    | 3.64 ± 0.98         | 3.20 ± 0.92              | 3.87 ± 0.92               | - 24.179 | <0.001 | 4.21 ± 0.75              | 3.07 ± 0.84  | - 50.230 | <0.001 |
|                                      |       | 3.67 ± 0.95         | 3.24 ± 0.91              | 3.90 ± 0.89               | - 24.296 | <0.001 | 4.24 ± 0.69              | 3.10 ± 0.82  | - 52.713 | <0.001 |
| Effectiveness                        | L2    | 3.91 ± 0.95         | 3.61 ± 0.93              | 4.07 ± 0.93               | - 16.448 | <0.001 | 4.47 ± 0.64              | 3.35 ± 0.88  | - 51.013 | <0.001 |
|                                      |       | 3.93 ± 0.93         | 3.62 ± 0.93              | 4.10 ± 0.89               | - 17.406 | <0.001 | 4.52 ± 0.55              | 3.35 ± 0.86  | - 57.313 | <0.001 |
| Trust in the vaccine delivery system | L4    | 3.97 ± 0.93         | 3.69 ± 0.93              | 4.12 ± 0.89               | - 15.707 | <0.001 | 4.55 ± 0.54              | 3.39 ± 0.87  | - 56.524 | <0.001 |
|                                      |       |                     |                          |                           |          |        |                          |              |          |        |
| Complacency                          |       |                     |                          |                           |          |        |                          |              |          |        |
| Necessity                            | L6    | 3.70 ± 1.04         | 3.03 ± 0.92              | 4.06 ± 0.92               | - 37.542 | <0.001 | 4.37 ± 0.72              | 3.02 ± 0.86  | - 59.913 | <0.001 |
|                                      |       | 3.04 ± 1.07         | 2.61 ± 0.94              | 3.27 ± 1.06               | - 22.561 | <0.001 | 3.49 ± 1.04              | 2.60 ± 0.89  | - 31.993 | <0.001 |
| Severity                             | L8    | 3.45 ± 0.97         | 3.03 ± 0.92              | 4.06 ± 0.92               | - 21.807 | <0.001 | 3.92 ± 0.85              | 2.97 ± 0.84  | - 39.720 | <0.001 |
|                                      |       |                     |                          |                           |          |        |                          |              |          |        |
| Convenience                          |       |                     |                          |                           |          |        |                          |              |          |        |
| Convenient transportation and time   | L9    | 3.59 ± 1.09         | 2.92 ± 1.01              | 3.95 ± 0.96               | - 34.818 | <0.001 | 4.23 ± 0.84              | 2.95 ± 0.93  | - 50.641 | <0.001 |
|                                      |       | 3.02 ± 1.11         | 2.99 ± 1.18              | 3.03 ± 1.08               | -1.092   | 0.275  | 3.32 ± 1.18              | 2.71 ± 0.95  | - 20.093 | <0.001 |
| Suitable price                       | L10   | 3.60 ± 1.09         | 3.15 ± 1.09              | 3.84 ± 1.02               | - 21.746 | <0.001 | 4.14 ± 0.96              | 3.06 ± 0.94  | - 39.811 | <0.001 |
|                                      |       |                     |                          |                           |          |        |                          |              |          |        |
| Good service quality                 | L11   |                     |                          |                           |          |        |                          |              |          |        |
|                                      |       |                     |                          |                           |          |        |                          |              |          |        |

\*Note: (i) All items in the table are converted to positive wording, i.e., reverse-worded items are reverse-assigned; (ii) See Table S1 for the names of L1-L11.

**Table S3.** Comparison of the scores of each dimension of the "3C" model for different IVH groupings (parents of children under 5).

| Dimensions                           | Total score average | IVH Status               |                           | t           | P      | OR (95%CI)          |
|--------------------------------------|---------------------|--------------------------|---------------------------|-------------|--------|---------------------|
|                                      |                     | Vaccine hesitant (IVH=1) | Vaccine acceptant (IVH=0) |             |        |                     |
| Confidence                           | 19.70 ± 3.92        | 17.75 ± 3.74             | 20.34 ± 3.77              | 11.464      | <0.001 | 0.846 (0.820-0.874) |
| Safety                               | 3.74 ± 0.96         | 3.22 ± 0.97              | 3.91 ± 0.90               | 12.007      | <0.001 | 0.470 (0.412-0.537) |
| Effectiveness                        | 7.80 ± 1.69         | 6.96 ± 1.69              | 8.08 ± 1.59               | 11.207      | <0.001 | 0.676 (0.628-0.728) |
| Trust in the vaccine delivery system | 8.16 ± 1.72         | 7.57 ± 1.73              | 8.35 ± 1.67               | 7.735       | <0.001 | 0.777 (0.727-0.831) |
| Complacency                          | 7.30 ± 2.58         | 9.17 ± 2.43              | 6.70 ± 2.33               | -<br>17.508 | <0.001 | 1.540 (1.540-1.450) |
| No necessity                         | 4.88 ± 1.85         | 6.25 ± 1.70              | 4.44 ± 1.67               | -<br>18.035 | <0.001 | 1.866 (1.713-2.033) |
| No Severity                          | 2.42 ± 0.97         | 2.92 ± 0.98              | 2.26 ± 0.92               | -<br>11.332 | <0.001 | 2.062 (1.804-2.356) |
| Convenience                          | 10.64 ± 2.61        | 9.34 ± 3.05              | 11.07 ± 2.30              | 10.001      | <0.001 | 0.769 (0.732-0.808) |
| Convenient transportation and time   | 3.78 ± 1.06         | 2.99 ± 1.07              | 4.04 ± 0.93               | 18.033      | <0.001 | 0.370 (0.323-0.423) |
| Suitable price                       | 3.09 ± 1.14         | 3.12 ± 1.30              | 3.08 ± 1.08               | -0.508      | 0.577  | 1.030 (0.929-1.141) |
| Good service quality                 | 3.77 ± 1.11         | 3.22 ± 1.17              | 3.95 ± 1.02               | 10.623      | <0.001 | 0.553 (0.495-0.618) |

**Table S4.** Logistic regression analysis of predictors of parental IVH (parents of children under 5).

| Characteristics                             | IVH=1<br>n(%) | N   | Univariate        |       |   | Multivariate   |       |   |
|---------------------------------------------|---------------|-----|-------------------|-------|---|----------------|-------|---|
|                                             |               |     | Unadjust<br>ed OR | 95%CI | P | Adjusted<br>OR | 95%CI | P |
| Sociodemographic characteristics of parents |               |     |                   |       |   |                |       |   |
| Age (<30 years old)                         | 31 (8.4)      | 143 | Ref               |       |   | Ref            |       |   |

| Characteristics                                 | IVH=1<br>n(%) | N    | Univariate    |               |       | Multivariate |               |       |
|-------------------------------------------------|---------------|------|---------------|---------------|-------|--------------|---------------|-------|
|                                                 |               |      | Unadjusted OR | 95%CI         | P     | Adjusted OR  | 95%CI         | P     |
| 30-40                                           | 226 (61.3)    | 1018 | 1.031         | (0.674-1.576) | 0.888 | 1.301        | (0.748-2.262) | 0.351 |
| 40-50                                           | 79 (21.4)     | 218  | 2.053         | (1.265-3.332) | 0.004 | 2.613        | (1.346-5.070) | 0.005 |
| ≥50                                             | 2 (0.5)       | 9    | 1.032         | (0.204-5.221) | 0.969 | 1.162        | (0.175-7.702) | 0.876 |
| Gender(Male)                                    | 89 (24.1)     | 357  | Ref           |               |       | Ref          |               |       |
| Female                                          | 280 (75.9)    | 1146 | 0.894         | (0.678-1.179) | 0.429 | 1.134        | (0.771-1.669) | 0.522 |
| Household Registration (Shanghai)               | 232 (62.9)    | 917  | Ref           |               |       | Ref          |               |       |
| Other areas (Residence ≥ 6 months)              | 137 (37.1)    | 586  | 0.901         | (0.707-1.148) | 0.399 | -            | -             | -     |
| Education level (Junior high school and below)  | 28 (7.60)     | 103  | Ref           |               |       | Ref          |               |       |
| High school or equivalent                       | 59 (16.0)     | 249  | 0.832         | (0.493-1.404) | 0.490 | -            | -             | -     |
| Bachelor's degree or equivalent                 | 218 (59.1)    | 923  | 0.828         | (0.523-1.312) | 0.422 | -            | -             | -     |
| Master's degree or above                        | 64 (17.3)     | 228  | 1.045         | (0.621-1.761) | 0.868 | -            | -             | -     |
| Health care worker (No)                         | 338 (91.6)    | 1375 | Ref           |               |       | Ref          |               |       |
| Yes                                             | 31 (8.4)      | 128  | 0.981         | (0.643-1.496) | 0.928 | -            | -             | -     |
| Teacher (No)                                    | 351 (95.1)    | 1452 | Ref           |               |       | Ref          |               |       |
| Yes                                             | 18 (4.9)      | 78   | 0.918         | (0.535-1.576) | 0.756 | -            | -             | -     |
| Monthly per capita household income (<2000 RNB) | 16 (4.3)      | 44   | Ref           |               |       | Ref          |               |       |
| 2000-5000                                       | 26 (7.1)      | 117  | 0.500         | (0.235-1.061) | 0.071 | 0.602        | (0.216-1.677) | 0.331 |
| 5000-10,000                                     | 108 (29.3)    | 443  | 0.564         | (0.294-1.081) | 0.085 | 0.786        | (0.319-1.677) | 0.602 |
| ≥10000                                          | 219 (59.4)    | 899  | 0.563         | (0.299-1.060) | 0.075 | 0.874        | (0.360-2.120) | 0.766 |
| Number of children (1)                          | 187 (50.7)    | 795  | Ref           |               |       | Ref          |               |       |
| 2                                               | 165 (44.7)    | 652  | 1.102         | (0.866-1.402) | 0.431 | -            | -             | -     |
| ≥3                                              | 17 (4.6)      | 56   | 1.417         | (0.784-2.564) | 0.249 | -            | -             | -     |
| Self-assessed health status (Healthy)           | 284 (77.0)    | 1224 | Ref           |               |       | Ref          |               |       |
| Good                                            | 71 (19.2)     | 249  | 1.320         | (0.973-1.792) | 0.075 | 1.362        | (0.910-2.038) | 0.133 |
| General or weak                                 | 14 (3.8)      | 30   | 2.896         | (1.396-6.006) | 0.004 | 1.541        | (0.544-4.367) | 0.416 |
| Child's age (1-year-old)                        | 95 (25.7)     | 402  | Ref           |               |       | Ref          |               |       |

| Characteristics                                                                                                      | IVH=1<br>n(%) | N        | Univariate        |                   |            | Multivariate   |                   |            |
|----------------------------------------------------------------------------------------------------------------------|---------------|----------|-------------------|-------------------|------------|----------------|-------------------|------------|
|                                                                                                                      |               |          | Unadjust<br>ed OR | 95%CI             | P          | Adjusted<br>OR | 95%CI             | P          |
| 2                                                                                                                    | 66 (17.9)     | 284      | 0.978             | (0.683-<br>1.401) | 0.905      | 1.02           | (0.627-<br>1.658) | 0.937      |
| 3                                                                                                                    | 91 (24.7)     | 324      | 1.262             | (0.904-<br>1.763) | 0.172      | 1.743          | (1.101-<br>2.760) | 0.018      |
| 4                                                                                                                    | 117 (31.7)    | 493      | 1.006             | (0.738-<br>1.371) | 0.972      | 1.624          | (1.053-<br>2.505) | 0.028      |
| Child's gender (Male)                                                                                                | 180 (48.8)    | 778      | Ref               |                   |            | Ref            |                   |            |
| Female                                                                                                               | 189 (51.2)    | 725      | 1.171             | (0.926-<br>1.482) | 0.187      | 1.209          | (0.882-<br>1.656) | 0.239      |
| Self-assessment of the child's health<br>status (Healthy)                                                            | 353 (95.7)    | 144<br>9 | Ref               |                   |            | Ref            |                   |            |
| General or weak                                                                                                      | 16 (4.3)      | 54       | 1.307             | (0.720-<br>2.373) | 0.378      | -              | -                 | -          |
| <b>Experience and willingness to get<br/>vaccinated</b>                                                              |               |          |                   |                   |            |                |                   |            |
| Has the child had the flu in the last<br>three years (No)                                                            | 310 (84.0)    | 127<br>1 | Ref               |                   |            | Ref            |                   |            |
| Yes                                                                                                                  | 59 (16.0)     | 232      | 1.057             | (0.766-<br>1.459) | 0.735      | -              | -                 | -          |
| Did the child receive a flu vaccine<br>for the 2021/2022 flu season (No)                                             | 356 (96.5)    | 110<br>8 | Ref               |                   |            | Ref            |                   |            |
| Yes                                                                                                                  | 13 (3.5)      | 395      | 0.072             | (0.041-<br>0.127) | <0.00<br>1 | 0.083          | (0.041-<br>0.166) | <0.00<br>1 |
| The number of doses of the child's<br>COVID-19 vaccine (0 dose)                                                      | 302 (81.8)    | 116<br>0 | Ref               |                   |            | Ref            |                   |            |
| 1 dose                                                                                                               | 17 (4.6)      | 75       | 0.833             | (0.477-<br>1.452) | 0.519      | 0.556          | (0.265-<br>1.167) | 0.121      |
| 2 doses                                                                                                              | 50 (13.6)     | 268      | 0.652             | (0.467-<br>0.910) | 0.012      | 0.361          | (0.226-<br>0.576) | <0.00<br>1 |
| Have you ever refused or<br>postponed free vaccinations for<br>your child, except for illnesses or<br>allergies (No) | 240 (65.0)    | 111<br>4 | Ref               |                   |            | Ref            |                   |            |
| Yes                                                                                                                  | 74(20.1)      | 250      | 1.531             | (1.127-<br>2.081) | 0.007      | 1.044          | (0.672-<br>1.621) | 0.849      |
| Uncertain                                                                                                            | 55(14.9)      | 139      | 2.384             | (1.649-<br>3.448) | <0.00<br>1 | 1.398          | (0.788-<br>2.480) | 0.251      |
| Whether they think free vaccines<br>are more important than self-pay<br>vaccines (No)                                | 80(21.7)      | 411      | Ref               |                   |            | Ref            |                   |            |
| Yes                                                                                                                  | 159 (43.1)    | 534      | 1.754             | (1.291-<br>2.384) | <0.00<br>1 | 1.382          | (0.914-<br>2.089) | 0.125      |
| Uncertain                                                                                                            | 130 (35.2)    | 558      | 1.257             | (0.919-<br>1.719) | 0.153      | 0.715          | (0.462-<br>1.105) | 0.131      |
| <b>Knowledge</b>                                                                                                     |               |          |                   |                   |            |                |                   |            |
| Score on the flu infection<br>knowledge test (Low)                                                                   | 62 (16.80)    | 141      | Ref               |                   |            | Ref            |                   |            |

| Characteristics                                                                                    | IVH=1<br>n(%)  | N   | Univariate        |                    |            | Multivariate   |                    |            |
|----------------------------------------------------------------------------------------------------|----------------|-----|-------------------|--------------------|------------|----------------|--------------------|------------|
|                                                                                                    |                |     | Unadjust<br>ed OR | 95%CI              | P          | Adjusted<br>OR | 95%CI              | P          |
| Moderate                                                                                           | 162<br>(43.90) | 550 | 0.532             | (0.364-<br>0.778)  | 0.001      | 0.875          | (0.519-<br>1.475)  | 0.617      |
| High                                                                                               | 145<br>(39.30) | 812 | 0.277             | (0.190-<br>0.404)  | <0.00<br>1 | 0.747          | (0.432-<br>1.292)  | 0.297      |
| Score on the flu vaccination<br>knowledge test (Low)                                               | 219<br>(59.35) | 565 | Ref               |                    |            | Ref            |                    |            |
| Moderate                                                                                           | 125<br>(33.88) | 671 | 0.362             | (0.280-<br>0.468)  | <0.00<br>1 | 0.551          | (0.385-<br>0.788)  | 0.001      |
| High                                                                                               | 25 (6.78)      | 267 | 0.163             | (0.105-<br>0.255)  | <0.00<br>1 | 0.346          | (0.193-<br>0.620)  | <0.00<br>1 |
| <b>Influences from others and society</b>                                                          |                |     |                   |                    |            |                |                    |            |
| Have you ever been affected by<br>negative news about the flu vaccine<br>(No)                      | 143<br>(38.75) | 784 | Ref               |                    |            | Ref            |                    |            |
| Yes                                                                                                | 115<br>(31.17) | 377 | 1.968             | (1.480-<br>2.615)  | <0.00<br>1 | 1.330          | (0.889-<br>1.990)  | 0.166      |
| Uncertain                                                                                          | 111<br>(30.08) | 342 | 2.154             | (1.612-<br>2.879)  | <0.00<br>1 | 1.399          | (0.918-<br>2.130)  | 0.118      |
| Have you ever received a doctor-<br>recommended influenza vaccine<br>(No)                          | 182<br>(49.32) | 639 | Ref               |                    |            | Ref            |                    |            |
| Yes                                                                                                | 120<br>(32.52) | 655 | 0.563             | (0.433-<br>0.732)  | <0.00<br>1 | 0.986          | (0.685-<br>1.419)  | 0.940      |
| Uncertain                                                                                          | 67 (18.16)     | 209 | 1.185             | (0.845-<br>1.660)  | <0.00<br>1 | 0.861          | 0.517-1.432)       | 0.563      |
| Have you ever been influenced by<br>people around you to give your<br>child a flu vaccination (No) | 182<br>(49.32) | 643 | Ref               |                    |            | Ref            |                    |            |
| Yes                                                                                                | 108<br>(29.27) | 657 | 0.498             | (0.381-<br>0.652)  | <0.00<br>1 | 0.986          | (0.685-<br>1.419)  | 0.003      |
| Uncertain                                                                                          | 79 (21.41)     | 203 | 1.614             | (1.160-<br>2.245)  | <0.00<br>1 | 0.861          | (0.517-<br>1.432)  | 0.644      |
| <b>"3C" Factors</b>                                                                                |                |     |                   |                    |            |                |                    |            |
| Confidence (Low)                                                                                   | 208<br>(56.37) | 474 | Ref               |                    |            | Ref            |                    |            |
| Moderate                                                                                           | 85 (23.04)     | 427 | 0.318             | (0.236-<br>0.429)  | <0.00<br>1 | 0.410          | (0.274-<br>0.614)  | <0.00<br>1 |
| High                                                                                               | 76 (20.60)     | 602 | 0.185             | (0.137-<br>0.250)  | <0.00<br>1 | 0.716          | (0.442-<br>1.159)  | 0.174      |
| Complacency (Low)                                                                                  | 15 (4.07)      | 352 | Ref               |                    |            | Ref            |                    |            |
| Moderate                                                                                           | 74 (20.05)     | 469 | 4.207             | (2.371-<br>7.467)  | <0.00<br>1 | 4.167          | (2.109-<br>8.232)  | <0.00<br>1 |
| High                                                                                               | 280<br>(75.88) | 682 | 15.642            | (9.123-<br>26.819) | <0.00<br>1 | 12.781         | (6.467-<br>25.260) | <0.00<br>1 |
| Convenience (Low)                                                                                  | 134<br>(36.31) | 256 | Ref               |                    |            | Ref            |                    |            |
| Moderate                                                                                           | 133<br>(36.04) | 669 | 0.226             | (0.166-<br>0.308)  | <0.00<br>1 | 0.158          | (0.103-<br>0.243)  | <0.00<br>1 |

| Characteristics | IVH=1<br>n(%)  | N   | Univariate    |               |        | Multivariate |               |        |
|-----------------|----------------|-----|---------------|---------------|--------|--------------|---------------|--------|
|                 |                |     | Unadjusted OR | 95%CI         | P      | Adjusted OR  | 95%CI         | P      |
| High            | 102<br>(27.64) | 578 | 0.195         | (0.141-0.270) | <0.001 | 0.333        | (0.213-0.522) | <0.001 |

\*Note: (i) This analysis did not include parents unaware of the flu vaccine; (ii) the Hosmer-Lemeshow test, chi-squared=14.6812, p=0.066.

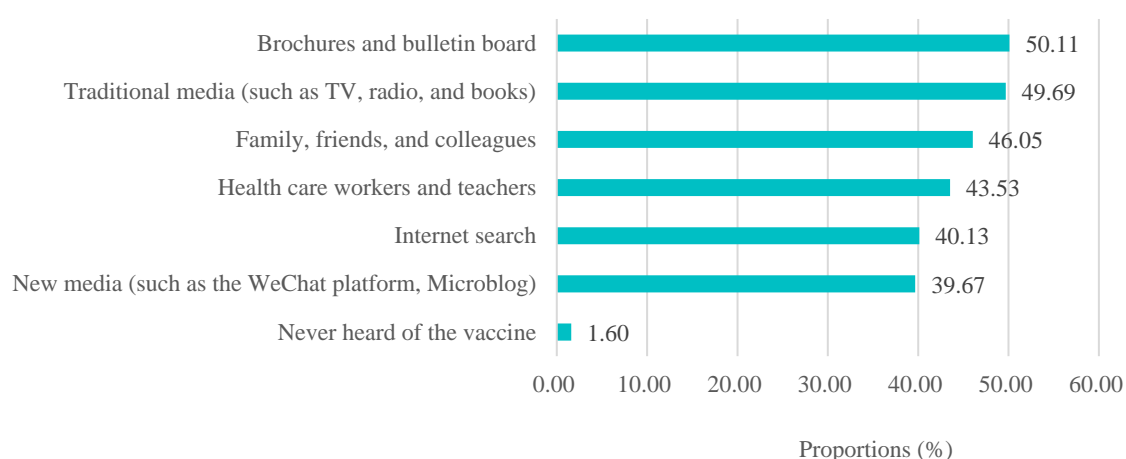

**Figure S2.** Key ways to learn about flu and the flu vaccine among parents.

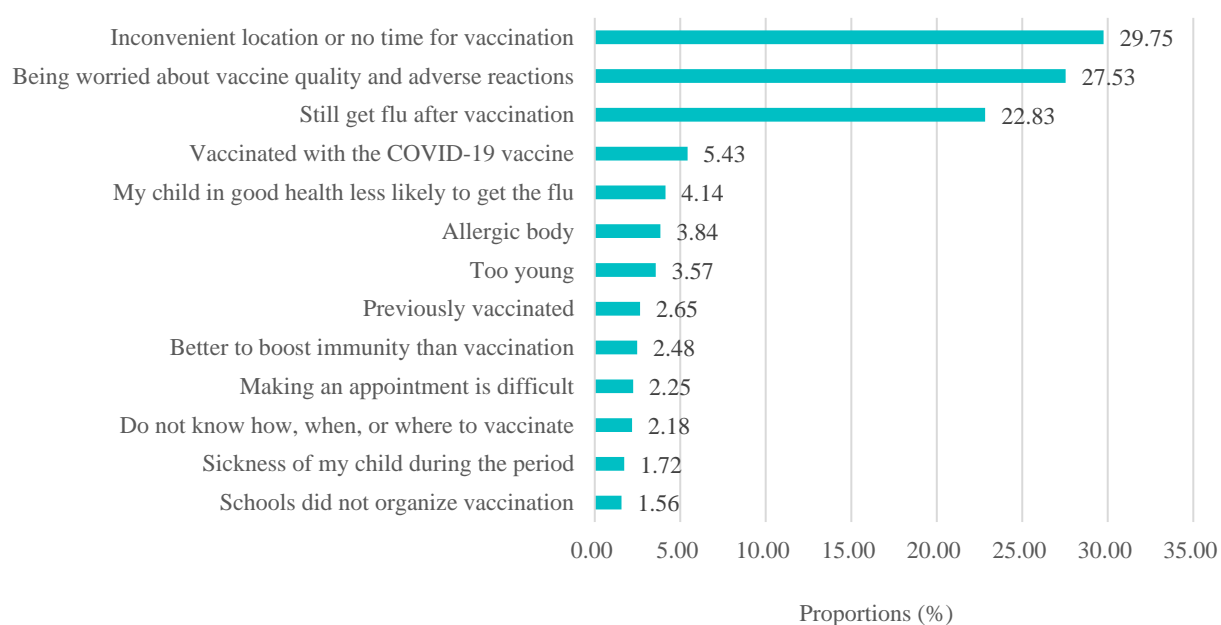

**Figure S3.** Reasons for not getting the flu vaccine among parents during the 2020/2021 flu season.



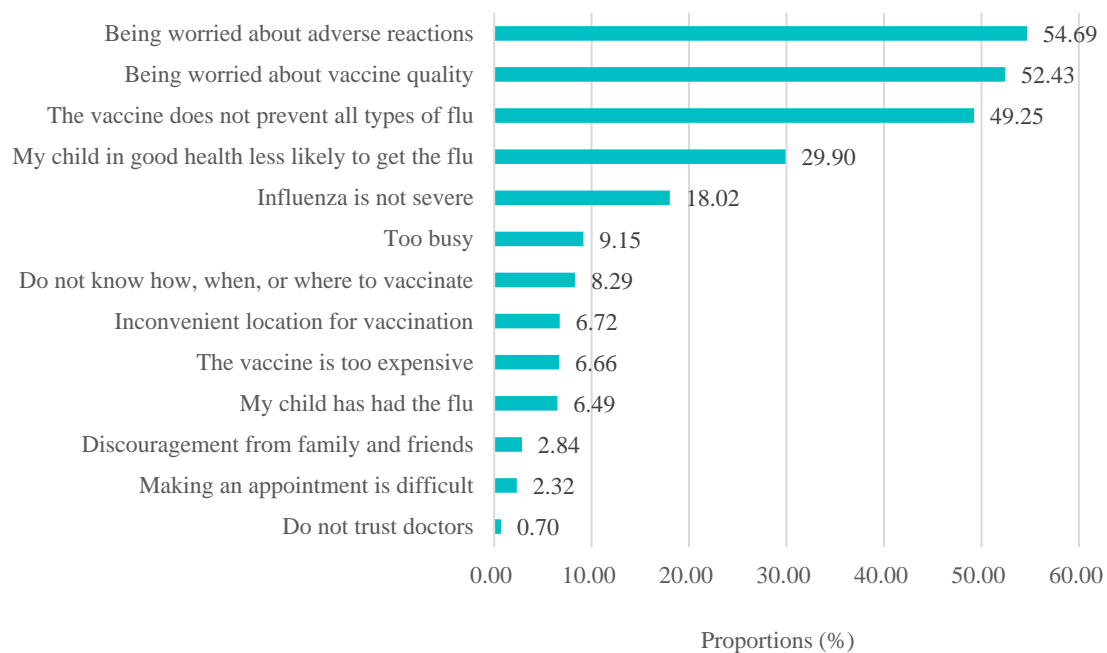

**Figure S4.** Reasons for flu vaccine hesitation among parents for the coming 2021/2022 flu season.
